# Supplementary material for: The preceding hyponatremia is a useful hallmark for the diagnosis of HHV-6 encephalitis after allogeneic hematopoietic stem cell transplantation
Source: PubMed Central journal article supplement (PMC9812762; doi:10.1038/s41409-022-01843-y), 2022-10-15
Supplement: 41409_2022_1843_MOESM1_ESM.pdf [file 41409_2022_1843_MOESM1_ESM.pdf]

**Supplemental Table 1. Patient and transplant characteristics**

|                                  | All patients<br>(N=134) | HHV-6 encephalitis |                     | P Value      |
|----------------------------------|-------------------------|--------------------|---------------------|--------------|
|                                  |                         | Positive<br>(N=14) | Negative<br>(N=120) |              |
| Median age (years) [range]       | 53 [19-72]              | 46 [28-68]         | 52 [20-70]          | 0.951        |
| Patient Age                      |                         |                    |                     |              |
| <50 years                        | 57                      | 8                  | 49                  | 0.266        |
| ≥50 years                        | 77                      | 6                  | 71                  |              |
| Gender                           |                         |                    |                     |              |
| Male                             | 88                      | 10                 | 78                  | 0.771        |
| Female                           | 46                      | 4                  | 42                  |              |
| Disease                          |                         |                    |                     |              |
| AML                              | 59                      | 9                  | 50                  | 0.167        |
| ALL                              | 31                      | 0                  | 31                  |              |
| MDS/MPN                          | 22                      | 3                  | 19                  |              |
| Malignant Lymphoma               | 14                      | 1                  | 13                  |              |
| Adult T-cell leukemia/lymphoma   | 3                       | 0                  | 3                   |              |
| Others                           | 5                       | 1                  | 4                   |              |
| Refined-DRI                      |                         |                    |                     |              |
| Very High/High                   | 76                      | 11                 | 65                  | 0.095        |
| Intermediate                     | 58                      | 3                  | 55                  |              |
| Donor source                     |                         |                    |                     |              |
| Related BM or PB, HLA match      | 16                      | 0                  | 16                  | 0.145        |
| Related BM or PB, HLA mismatch   | 32                      | 1                  | 31                  |              |
| Unrelated BM or PB, HLA match    | 13                      | 2                  | 11                  |              |
| Unrelated BM or PB, HLA mismatch | 13                      | 1                  | 12                  |              |
| CB                               | 60                      | 10                 | 50                  |              |
| Conditioning regimen             |                         |                    |                     |              |
| MAC                              | 108                     | 11                 | 97                  | 0.735        |
| RIC                              | 26                      | 3                  | 23                  |              |
| GVHD prophylaxis                 |                         |                    |                     |              |
| TAC alone                        | 17                      | 5                  | 12                  | <b>0.018</b> |
| Multiple drugs combination       | 117                     | 9                  | 108                 |              |

AML acute myeloid leukemia, ALL acute lymphoblastic leukemia, BM bone marrow, CB cord blood, DRI disease risk index, GVHD graft-versus-host disease, HLA human leukocyte antigen, MAC myeloablative conditioning, MDS myelodysplastic syndrome, MPN myeloproliferative neoplasm, PB peripheral blood stem cell, RIC reduced-intensity conditioning, TAC tacrolimus.

**Supplemental Table 2. Classification of GVHD prophylaxis regimens**

|                        | Total allo-HSCT<br>(N=134) |                 |               |
|------------------------|----------------------------|-----------------|---------------|
|                        | BMT<br>(N=29)              | PBSCT<br>(N=45) | CBT<br>(N=60) |
| TAC+sMTX<br>(N=44)     | 25                         | 6               | 13            |
| TAC+sMTX+ATG<br>(N=10) | 4                          | 6               | 0             |
| TAC+MMF<br>(N=33)      | 0                          | 1               | 32            |
| TAC alone<br>(N=17)    | 0                          | 2               | 15            |
| PTCY+TAC+MMF<br>(N=30) | 0                          | 30              | 0             |

*Allo-HSCT* allogeneic hematopoietic stem cell transplantation, *ATG* anti-thymocyte globulin, *BMT* bone marrow transplantation, *CBT* cord blood transplantation, *MMF* mycophenolate mofetil, *PBSCT* peripheral blood stem cell transplantation, *PTCY* post-transplantation cyclophosphamide, *sMTX* short-term methotrexate, *TAC* tacrolimus.

**Supplemental Table 3. Univariate and multivariate analysis of risk factors for the cumulative incidence of HHV-6 encephalitis**

|                                   | Univariate analysis  |                  | Multivariate analysis |                  |
|-----------------------------------|----------------------|------------------|-----------------------|------------------|
|                                   | Hazard ratio (95%CI) | P Value          | Hazard ratio (95%CI)  | P Value          |
| Male Recipient                    | 0.207 (0.412-4.149)  | 0.649            | -                     | -                |
| Refined-DRI :<br>Very High / High | 3.157 (0.854-10.470) | 0.076            | 2.959 (0.811-10.800)  | 0.1005           |
| HLA-Mismatched Donor              | 0.548 (0.403-7.471)  | 0.459            | -                     | -                |
| CBT                               | 4.748 (1.087-10.490) | <b>0.029</b>     | 2.457 (0.658-9.179)   | 0.1811           |
| MAC                               | 0.033 (0.254-3.113)  | 0.856            | -                     | -                |
| TAC alone                         | 8.064 (1.537-13.830) | <b>0.005</b>     | 1.981 (0.485-8.090)   | 0.341            |
| ES / PIR                          | 3.277 (0.909-7.210)  | 0.07             | 1.130 (0.307-4.165)   | 0.8539           |
| Hyponatremia                      | 9.615 (2.946-31.380) | <b>0.0001766</b> | 9.501 (2.534-35.620)  | <b>0.0008399</b> |

*CBT* cord blood transplantation, *DRI* disease risk index, *ES* engraftment syndrome, *HLA* human leukocyte antigen, *MAC* myeloablative conditioning, *PIR* pre-engraftment immune reaction, *TAC* tacrolimus.
